1  
2  
3  
4  
5  
6  
7  
8  
9  
10  
11  
12  
13  
14  
15  
16  
17  
18  
19  
20  
21  
22  
23

**The N-terminal domain of spike glycoprotein mediates SARS-CoV-2 infection  
by associating with L-SIGN and DC-SIGN**

Wai Tuck Soh<sup>1</sup>, Yafei Liu<sup>1,2</sup>, Emi E. Nakayama<sup>3</sup>, Chikako Ono<sup>4</sup>, Shiho Torii<sup>4</sup>, Hironori Nakagami<sup>5</sup>, Yoshiharu Matsuura<sup>4</sup>, Tatsuo Shioda<sup>3</sup>, Hisashi Arase<sup>1,2,\*</sup>.

<sup>1</sup>Laboratory of Immunochemistry, World Premier International Immunology Frontier Research Centre, Osaka University, Osaka, Japan.

<sup>2</sup>Department of Immunochemistry, Research Institute for Microbial Diseases, Osaka University, Osaka, Japan.

<sup>3</sup>Department of Viral Infections, Research Institute for Microbial Diseases, Osaka University, Osaka, Japan.

<sup>4</sup>Department of Molecular Virology, Research Institute for Microbial Diseases, Osaka University, Osaka, Japan.

<sup>5</sup>Department of Health Development and Medicine, Graduate school of Medicine, Osaka University, Osaka, Japan.

\*To whom correspondence should be addressed. E-mail: [arase@biken.osaka-u.ac.jp](mailto:arase@biken.osaka-u.ac.jp)

24 **The widespread occurrence of SARS-CoV-2 has had a profound effect on society and a**  
25 **vaccine is currently being developed. Angiotensin-converting enzyme 2 (ACE2) is the**  
26 **primary host cell receptor that interacts with the receptor-binding domain (RBD) of the**  
27 **SARS-CoV-2 spike protein. Although pneumonia is the main symptom in severe cases of**  
28 **SARS-CoV-2 infection, the expression levels of ACE2 in the lung is low, suggesting the**  
29 **presence of another receptor for the spike protein. In order to identify the additional**  
30 **receptors for the spike protein, we screened a receptor for the SARS-CoV-2 spike protein**  
31 **from the lung cDNA library. We cloned L-SIGN as a specific receptor for the N-terminal**  
32 **domain (NTD) of the SARS-CoV-2 spike protein. The RBD of the spike protein did not bind**  
33 **to L-SIGN. In addition, not only L-SIGN but also DC-SIGN, a closely related C-type lectin**  
34 **receptor to L-SIGN, bound to the NTD of the SARS-CoV-2 spike protein. Importantly, cells**  
35 **expressing L-SIGN and DC-SIGN were both infected by SARS-CoV-2. Furthermore, L-**  
36 **SIGN and DC-SIGN induced membrane fusion by associating with the SARS-CoV-2 spike**  
37 **protein. Serum antibodies from infected patients and a patient-derived monoclonal antibody**  
38 **against NTD inhibited SARS-CoV-2 infection of L-SIGN or DC-SIGN expressing cells. Our**  
39 **results highlight the important role of NTD in SARS-CoV-2 dissemination through L-SIGN**  
40 **and DC-SIGN and the significance of having anti-NTD neutralizing antibodies in antibody-**  
41 **based therapeutics.**

42

## 43 **Introduction**

44 Coronavirus disease 2019 (COVID-19) is caused by the novel human coronavirus, a severe acute  
45 respiratory syndrome coronavirus 2 (SARS-CoV-2)<sup>1,2</sup>. SARS-CoV-2 is an enveloped virus and  
46 requires specific cellular receptors to infect cells in a manner similar to that observed in other  
47 enveloped viruses such as the influenza virus and herpesviruses<sup>3-7</sup>. The spike glycoprotein of  
48 SARS-CoV-2 associates with ACE2 on host cells and mediates membrane fusion with the host  
49 cell membrane during infection<sup>3,4</sup>. The spike glycoprotein is organized as a homotrimer and each  
50 chain is composed of two main segments, the S1 and S2 subunits. The S1 subunit is responsible  
51 for receptor binding, whereas the S2 subunit mediates membrane fusion<sup>8,9</sup>. Within the S1 subunit  
52 are two domains known as the N-terminal domain (NTD) and receptor-binding domain (RBD).  
53 The RBD is recognized as the main domain that interacts with the ACE2 receptor on the host cells  
54 and antibodies against RBD block infection<sup>9</sup>. Although the function of surface-exposed NTD that  
55 is structurally coupled with the RBD of the neighboring chain still remains unclear, certain human  
56 anti-NTD monoclonal antibodies neutralize SARS-CoV-2 infection<sup>10</sup>. This suggests that NTD as  
57 well as RBD play a pivotal role in SARS-CoV-2 infection.

58         Pneumonia is the primary complication associated with SARS-CoV-2 infection in severe  
59 cases<sup>11</sup>. Although ACE2 is highly expressed in the intestine and kidney, the expression of ACE2  
60 in the lung is limited, and relatively low levels of ACE2 expression are observed only in type-II  
61 alveolar cells<sup>12</sup>. Therefore, it has remained unclear how the low levels of ACE2 in the lung are  
62 involved in pneumonia caused by SARS-CoV-2 infection. In addition, a single-cell RNA  
63 sequencing study of bronchoalveolar-lavage samples revealed that viral RNA could be detected in  
64 cell populations that did not express ACE2<sup>13</sup>. Taken together, this evidence indicates that ACE2  
65 expression alone cannot explain the tropism of SARS-CoV-2 infection, and alternative entry

66 receptors might be involved in SARS-CoV-2 infection of ACE2-low or deficient cells. Besides,  
67 SARS-CoV-2 is also detected in multiple non-pulmonary organs such as the intestine, liver, kidney,  
68 and blood vessels of COVID-19 patients<sup>14</sup>. Based on these observations, we sought to identify a  
69 potential alternative receptor for the SARS-CoV-2 spike protein using a lung cDNA library and  
70 discuss the mechanisms of SARS-CoV-2 dissemination within the host.

71

## 72 **Results**

73

### 74 **Lung cDNA library screening identified L-SIGN as a receptor for NTD of the SARS-CoV-2** 75 **spike protein (SCoV2-NTD).**

76 In order to identify a receptor in the lung for the SCoV2-spike protein, we used expression cloning  
77 with a lung retrovirus cDNA library. Cells transfected with a lung cDNA library were stained with  
78 SCoV2-NTD human IgG-Fc fusion protein (SCoV2-NTD-Fc) as well as RBD-Fc fusion protein  
79 (SCoV2-RBD-Fc) and the stained cells were enriched using a cell sorter (Fig. 1a). After two rounds  
80 of enrichment, 83.7% of the cells were stained with SCoV2-NTD-Fc (Fig. 1b) while we could not  
81 obtain cells stained with SCoV2-RBD-Fc even after three rounds of enrichment. We obtained  
82 single-cell clones that were stained with SCoV2-NTD-Fc and amplified the genes derived from  
83 the library using PCR. Notably, L-SIGN (CD299) was identified from all the clones that were  
84 stained with SCoV2-NTD-Fc (Fig. 1c). Following this observation, the cell clones were stained  
85 with antibodies against L-SIGN (Fig. 1d). These data suggested that L-SIGN is a major molecule  
86 that interacts with SCoV2-NTD in the lung. Although L-SIGN is mostly expressed in the liver, the  
87 lung has the second-highest expression of L-SIGN according to the RNA-seq tissue data obtained  
88 from the Genotype-Tissue Expression (GTE) project (Suppl. Fig. 1).

89  
90 **NTD of the spike facilitates the binding of SCoV2 to L-SIGN and DC-SIGN via unique**  
91 **glycans**

92 L-SIGN shares a high amino acid sequence homology and functional similarity with DC-SIGN  
93 that is also present in the lung (Suppl. Fig. 1). On the other hand, CD147 has been reported to be  
94 involved in SARS-CoV-2 infection<sup>15</sup>. Accordingly, we transfected L-SIGN, DC-SIGN, ACE2,  
95 and CD147 into HEK293T cells and evaluated the binding of NTD- or RBD-Fc fusion proteins  
96 (Fig. 2a). We observed that the NTD-Fc bound to both surface-expressed L-SIGN and DC-SIGN  
97 transfectants but not to ACE2 and CD147 transfectants. The RBD-Fc fusion protein bound to  
98 ACE2 but not L-SIGN, DC-SIGN, or CD147 transfectants. This indicates that the binding of NTD-  
99 Fc to L-SIGN or DC-SIGN is mediated by NTD and not the Fc portion. Anti-DC-SIGN mAb  
100 blocked the binding of NTD-Fc to DC-SIGN transfectants but not to L-SIGN transfectants (Fig.  
101 2b). L-SIGN and DC-SIGN have been shown to bind to intercellular adhesion molecule 3 (ICAM-  
102 3) through sugar chain recognition. In addition, mannan is known to be a ligand of both L-SIGN  
103 and DC-SIGN. When DC- or L-SIGN transfectants were preincubated with mannan, the binding  
104 of NTD-Fc to DC-SIGN and L-SIGN was drastically reduced (Fig. 2b). These data indicate that  
105 unique glycans on NTD of SARS-CoV-2 are involved in the interaction with L-SIGN and DC-  
106 SIGN.

107         The SCoV spike protein has a high sequence similarity (approximately 76%) to the SCoV2  
108 spike protein. However, SCoV-NTD-Fc fusion protein did not bind to DC-SIGN or L-SIGN  
109 transfectants unlike the SCoV2-NTD-Fc fusion protein (Fig. 2c). Similarly, DC-SIGN-Fc and L-  
110 SIGN-Fc fusion proteins bound to flag-tagged SCoV2 spike transfectants, but bound weakly to  
111 SCoV spike transfectants although both transfectants were well stained with anti-flag mAb (Fig.

112 2d). Likewise, DC-SIGN-Fc and L-SIGN-Fc fusion proteins did not bind to the human  
113 coronaviruses, OC43 and HKU1 (Suppl. Fig. 2). These results also suggested that the NTD of the  
114 SCoV2 spike protein is specifically modified by unique glycans that mediate the binding of NTD  
115 to L-SIGN and DC-SIGN.

116         There are seven and eight N-glycosylation sites located on the NTD of SCoV and SCoV2,  
117 respectively (Fig. 3a). The protein sequence alignment of both NTDs revealed that there are two  
118 unique glycosylation sites, i.e., N74 and N149, on the SCoV2-NTD (Fig. 3a). Interestingly, both  
119 glycosylation sites are in the most variable region within the NTD. To identify which glycosylation  
120 sites interact with DC-SIGN, we substituted SCoV2-NTD glycosylation site Asn (N) with Gln (Q)  
121 and analyzed the binding to DC-SIGN (Fig. 3b, c). The mutation at N149Q diminished the NTD  
122 binding to DC-SIGN, while N74Q and N282Q mutation resulted in a substantial reduction of the  
123 NTD binding to DC-SIGN. These data suggest that unique glycans on N149 of NTD are  
124 responsible for the interaction with SIGNs.

125

### 126 **L-SIGN and DC-SIGN mediate SCoV2 infection by inducing membrane fusion**

127 It has been reported that L-SIGN and DC-SIGN are involved in infection by several viruses such  
128 as HIV, HCV, and SARS-CoV. To determine whether L-SIGN and DC-SIGN are involved in  
129 SCoV2 infection, we used SCoV2 spike-pseudotyped vesicular stomatitis virus (SCoV2-PV)  
130 carrying a luciferase reporter gene to infect HEK293T cells stably transfected with L-SIGN or DC-  
131 SIGN and analyzed the outcome (Fig. 4a, Suppl. Fig. 2). L-SIGN and DC-SIGN transfectants were  
132 considerably infected with SCoV2-PV. Furthermore, bona fide SCoV2 also infected L-SIGN and  
133 DC-SIGN transfectants. This indicated that DC-SIGN and L-SIGN serve as receptors for SCoV2  
134 infection.

135           Being an enveloped virus, membrane fusion between the viral envelope of SCoV2 and the  
136 host cell membrane is a critical step in viral infection. To understand the function of L-SIGN and  
137 DC-SIGN in membrane fusion during SCoV2 infection, we used a cell-cell fusion assay using a  
138 T7 promoter-based luciferase reporter system<sup>7,16</sup>. In this system, we cocultured effector cells  
139 (transfected with SCoV2 spike and T7 polymerase) with target cells (transfected with DC-SIGN  
140 or L-SIGN with luciferase gene regulated by a T7 promoter) and the luciferase gene is expressed  
141 only when cell-cell fusion between effector cells and target cells is induced. Interestingly, cell-cell  
142 fusion activity occurred when effector cells were cocultured with target cells expressing L-SIGN  
143 or DC-SIGN (Fig. 4c). Additionally, when effector cells expressing SCoV2 spike protein and red  
144 fluorescence protein were cocultured with target cells expressing DC-SIGN and green  
145 fluorescence protein, fused cells expressing both red and green fluorescence proteins were detected  
146 (Fig. 4d). These data suggest that L-SIGN or DC-SIGN mediate membrane fusion during SCoV2  
147 infection of SIGN-expressing cells.

148

#### 149 **moDCs facilitate SCoV-2 dissemination in trans via DC-SIGN.**

150 We then sought to establish the function of endogenously expressed L-SIGN or DC-SIGN. Since  
151 L-SIGN has been reported to be expressed in type II alveolar cells, L-SIGN is likely involved in  
152 the SARS-CoV-2 infection of lungs. However, we could not find any cell lines expressing  
153 endogenous L-SIGN. On the other hand, DC-SIGN is expressed on monocyte-derived DCs  
154 (moDCs). For that reason, we isolated CD14<sup>+</sup> cells from human PBMC and differentiated them  
155 into DCs in the presence of cytokines, IL-4 and GM-CSF. The moDCs expressed DC-SIGN, low  
156 CD14, high MHC-II, and CD74 (Fig. 5a). As observed with DC-SIGN transfectants (Fig. 2),  
157 SCoV2-NTD-Fc fusion protein bound to moDCs (Fig. 5b). Anti-DC-SIGN monoclonal antibodies

158 and mannan prevented the binding of NTD-Fc to moDCs (Fig. 5c). These results indicated that  
159 DC-SIGN was expressed on primary cells associated with the NTD of the SCoV2 spike protein.  
160 However, moDCs were not infected with SCoV2-PV, but with the VSV-G PV (Fig. 5d). Recently,  
161 CD74 induced by CIITA has been reported to inhibit the membrane fusion of SCoV2<sup>17</sup>. The  
162 considerable expression of CD74 by moDCs (Fig. 5a) may confer resistance to SCoV2 infection.  
163 Therefore, there is likely that L-SIGN or DC-SIGN expressed in CD74 negative cells could play  
164 a critical role in SARS-CoV-2 infection.

165 NTD-Fc has been observed to bind well to moDCs; therefore, SCoV2 virions bound to DC-  
166 SIGN on moDCs may be infectious to other cells. We incubated moDCs with SCoV2-PV followed  
167 by extensive washing. Thereafter, moDCs incubated with SCoV2-PV were cocultured with Vero  
168 cells. Significant infection was observed in Vero cells and the infection was completely blocked  
169 by anti-DC-SIGN antibodies or mannan (Fig. 5e). Due to the general circulation of DCs in the  
170 body, SCoV2 bound to DCs via DC-SIGN may be involved in the spread of SCoV2 throughout  
171 the body.

172

### 173 **Neutralization of SIGN-mediated SCoV2 infection by antibodies**

174 Antibodies are of importance in host defense against SARS-CoV-2 infection. The function of  
175 antibodies in SIGN-mediated SARS-CoV-2 infection was evaluated. 4A8 and 4A2 are COVID-19  
176 patient-derived anti-NTD mAbs<sup>10</sup> and C144 is an anti-RBD mAb<sup>18</sup> (Suppl. Fig. 3). Both 4A8 and  
177 C144 have been reported to neutralize SCoV2 infection. Surprisingly, anti-RBD C144 mAbs as  
178 well as anti-NTD 4A8 blocked SCoV2-PV infection of HEK-L-SIGN and HEK-DC-SIGN. In  
179 contrast, the 4A2 mAb did not block infection (Fig. 6a, b). These data indicate that RBD as well  
180 as NTD are involved in SCoV2 infection of SIGN-expressing cells. The effect of antibodies



181 derived from SCoV2-infected patients was investigated; their sera contain antibodies against NTD  
182 and RBD (Suppl. Fig. 4). SCoV2-PV infection of DC-SIGN transfectants was hindered by the sera  
183 from two SCoV2-infected patients but not from healthy control serum (Fig. 6c). On the other hand,  
184 the sera could not neutralize VSV-G PV infection. (Fig. 6d). This shows that SIGN-mediated  
185 infection is counteracted by serum antibodies against spike proteins similar to ACE2-mediated  
186 infection. In addition, our data imply that antibodies against NTD as well as RBD are useful in  
187 blocking SCoV2 infection<sup>19,20</sup>.

188

## 189 **Discussion**

190 SCoV2 is more widespread than its closest human coronavirus, SCov3, and therapeutic  
191 interventions are yet to be identified. ACE2 is the primary receptor that interacts with the SCoV2  
192 spike glycoprotein (i.e., RBD) and consequently facilitates viral entry<sup>3</sup>. However, the  
193 understanding of the pathogenesis of SCoV2 remains incomplete, including the mechanism of  
194 pneumonia, thrombosis, endothelitis, and cytokine storm, which are often associated with severe  
195 cases of the disease<sup>21-23</sup>. It is unclear how SCov2 causes pneumonia since the expression of ACE2  
196 in the lung is relatively low and limited to type-II alveolar cells and some (<2%) of the respiratory  
197 epithelial cells<sup>12</sup>. Additionally, the presence of SCoV2 in non-pulmonary organs<sup>14</sup> as well as the  
198 detection of viral DNA in non-ACE2 expressing cells<sup>13</sup> point to an alternative receptor for SCoV2  
199 entry and an unknown virus-spreading mechanism within the host. Recently, neuropilin has been  
200 reported to be involved in the SCoV2 cell entry by associating with the proteolytically processed  
201 spike protein. However, transfection of neuropilin alone to HEK293 cells did not mediate the  
202 SCoV2 infection, and the coexpression of ACE2 and TMPRSS2 with neuropilin was required for  
203 the SCoV2 infection<sup>24,25</sup>. On the other hand, L-SIGN, cloned from lung cDNA library as an NTD

204 binding receptor, and DC-SIGN mediated SCoV2 infection in the absence of ACE2 and TMPRSS2.  
205 Indeed, L-SIGN is expressed in lung type-II alveolar cells and endothelial cells<sup>26</sup>. Furthermore,  
206 DCs or specialized macrophages expressing DC-SIGN can be found in the lung<sup>27,28</sup>. Their  
207 localization in the lung further strengthens the increasingly likely role of L-SIGN and DC-SIGN  
208 as receptors of SCoV2 and may therefore be important in the pathogenesis of pneumonia.

209         The interaction of the SCoV2-NTD with L-SIGN and DC-SIGN is specific and glycan  
210 dependent. Despite the NTD of SCoV being a highly glycosylated domain, our analyses indicate  
211 that the interaction between NTD and DC-SIGN or L-SIGN is apparently unique to the current  
212 SCoV2 because L-SIGN-Fc or DC-SIGN-Fc hardly bound to the spike protein of SCoV as well as  
213 human coronavirus OC43 and HKU1. Previous findings have shown that SCoV spike protein  
214 interacts with DC-SIGN and L-SIGN albeit with a low binding efficiency<sup>26,29</sup>. Similarly, we  
215 observed a very weak binding of DC- and L-SIGN-Fc to SCoV spike protein, whereas the binding  
216 to the SCoV2 spike was stronger. The overall glycosylation profile of the SCoV2 spike protein is  
217 quite different from that of SCoV<sup>30-32</sup> with the N-linked glycan at residue 149 being the major  
218 glycan involved in the DC-SIGN and NTD interaction. The N-linked glycosylation site at residue  
219 149 of SCoV2-NTD is absent in SCoV-NTD, although other N-linked glycosylation sites are  
220 conserved in SCoV-NTD. This may be the reason why L- and DC-SIGN interactions with NTD  
221 are more apparent in the current SCoV2. Indeed, both L-SIGN and DC-SIGN recognize a  
222 pentasaccharide motif (GlcNAc<sub>2</sub>Man<sub>3</sub>)<sup>33</sup> that is also present in the glycans at N149 of SCoV2-  
223 NTD<sup>30</sup>.

224         We demonstrated that L-SIGN and DC-SIGN mediate both the pseudotyped and bona fide  
225 SARS-CoV-2 infections. Furthermore, both L-SIGN and DC-SIGN induce cell-cell fusion via  
226 their association with the spike protein. SCoV2 requires proteolytic cleavage of the spike protein

227 by the host proteases (e.g., TMPRSS2) after binding to an entry receptor<sup>3</sup>. Besides, the lysosomal  
228 protease, cathepsin L was shown to proteolytically activate the SCoV spike protein during viral  
229 entry thereby facilitating membrane fusion with the host cell membrane<sup>34</sup>. Recent research  
230 revealed that the thyroglobulin domain (cathepsin L inhibitor) of the CD74 p41 isoform blocks the  
231 cathepsin L-mediated viral entry of SCoV2<sup>17</sup>. CD74 is an essential molecule for the proper  
232 assembling of MHC class II molecules and its expression is regulated by CIITA, a principal  
233 transcription factor for MHC class II expression<sup>35</sup>. Because moDCs express both CD74 and MHC  
234 class II molecules favorably, CD74 appears to be responsible for the resistance of moDCs to  
235 SCoV2 infection. However, expression of CD74 is largely limited to immune cells such as B cells,  
236 monocytes, and dendritic cells, while most cells including endothelial cells do not express CD74.  
237 Therefore, L-SIGN or DC-SIGN expressing cells that lack CD74 expression appear to be  
238 susceptible to SCoV2 infection.

239 We also show that moDCs facilitate pseudotyped SCoV2 infection in Vero cells in trans.  
240 Trans-infection by DCs is well reported in HIV infection<sup>36</sup>. Due to their migration in the body,  
241 DCs may function as transporters of SCoV2 by associating with the virus via DC-SIGN to infect  
242 cells expressing ACE2 or L-SIGN, which in turn facilitates virus dissemination in the host. This  
243 might explain the presence of viral protein in other organs, including the liver<sup>14</sup>, where L-SIGN is  
244 highly expressed in human liver sinusoidal endothelial cells that do not express CD74<sup>37</sup>.  
245 Furthermore, infection of the endothelial cells of blood vessels may consequently lead to  
246 thrombosis, which is frequently linked to severe disease conditions<sup>22</sup>. Several human tissues  
247 express similar mRNA expression levels of L-SIGN as those of the lung, making them likely  
248 targets of SCoV2 infection.

249           The presence of neutralizing antibodies for DC-SIGN-mediated SCoV2 infection in  
250 COVID-19 patients implies the relevance of NTD as a therapeutic target besides RBD. Notably,  
251 the majority of the isolated mAb from SCoV2 patients did not recognize RBD and those mAbs  
252 that neutralize SCoV2 failed to prevent binding of the spike to ACE2<sup>10</sup>. In our study, the NTD-  
253 specific mAb, 4A8, neutralized SIGN-mediated infection of SCoV2, suggesting the therapeutic  
254 potential of anti-NTD antibodies against SIGN-mediated infection. More importantly, anti-RBD  
255 mAb also inhibited the SCoV2-PV infection of DC-SIGN and L-SIGN expressing cells. Although  
256 HEK293 cells do not express ACE2, certain molecules on HEK293 cells may interact with RBD  
257 becoming involved in infection of SIGN-expressing cells. This may suggest that L-SIGN or DC-  
258 SIGN is required for the infection of ACE2-low or ACE2-negative cells, where levels are not  
259 enough to mediate SCoV2 infection. Further analysis of L-SIGN or DC-SIGN-mediated infection  
260 would be important to understand the etiology of SARS-CoV-2-related diseases. Also, targeting  
261 SIGN-mediated infection as well as ACE2-mediated infection would be important for effective  
262 vaccine development.

263

## 264 **Methods**

265

266 **Antibodies.** Mouse anti-CD209 mAb (clone 9E9A8), mouse IgG2a isotype control antibody  
267 (BioLegend, San Diego, CA, USA), mouse anti-L-SIGN mAb (clone 19F7), mouse anti-MHCII  
268 (clone WR18) (Santa Cruz Biotechnology, Dallas, TX, USA), mouse anti-human ACE2 mAb  
269 (R&D Systems, Minneapolis, MN, USA), rat anti-Flag mAb (Sigma-Aldrich, St Louis, MI, USA),  
270 mouse anti-human CD14-APC mAb (eBioscience, San Diego, CA, USA), Donkey anti-mouse

271 IgG-APC mAb, anti-human IgG-Fc fragment specific-APC mAb, anti-rat IgG-APC mAb (Jackson  
272 ImmunoResearch, West Grove, PA, USA).

273

274 **Cell lines and cell culture.** The following cell lines were used in this study: Vero E6 is an African  
275 Green Monkey Kidney cell line, HEK293T cells are a human kidney cell line, HEK293T-DC-  
276 SIGN is a stable transfectant of HEK293T expressing DC-SIGN, HEK293T-L-SIGN is a stable  
277 transfectant of HEK293T expressing L-SIGN, HEK293T-ACE2 is a stable transfectant of  
278 HEK293T expressing ACE2, HEK293T-L-SIGN/TMPRSS2 is a stable transfectant of HEK293T  
279 expressing L-SIGN and TMPRSS2, HEK293T-DC-SIGN/TMPRSS2 is a stable transfectant of  
280 HEK293T expressing L-SIGN and TMPRSS2. Stable cell lines were prepared using retrovirus  
281 transfection produced from Plat-E<sup>38</sup>. Briefly, Plat-E cells were co-transfected with target gene  
282 vectors and an amphotropic envelope vector using polyethylenimine (PEI; Polysciences,  
283 Warrington, PA, USA) as described previously<sup>39</sup>. Culture supernatant containing retroviruses was  
284 harvested after 48 hours and premixed with DOTAP liposomal transfection reagent (Roche, Basel,  
285 Switzerland) prior to spin transfection at 2400 rpm at 32°C for 2 hours into target cells. The  
286 transfected cells were cultured for three days and subsequently sorted using an SH800S cell sorter  
287 (Sony, Minato City, Tokyo, Japan). All cell lines were maintained in DMEM (Nacalai Tesque,  
288 Kyoto, Japan) supplemented with 10% heat-inactivated fetal bovine serum (FBS) (Biological  
289 Industries, Cromwell, CT, USA), penicillin (100 U/mL), and streptomycin (100 µg/mL) (Nacalai  
290 Tesque, Japan) and cultured at 37°C in 5% CO<sub>2</sub>.

291

292 **Genes**

293 The followings genes were used in the current study, SARS-CoV-2 spike (amino acid from 1–  
294 1273, GenBank accession NC\_045512.2), SARS-CoV spike (amino acid from 1–1255, GenBank  
295 accession AY278491), human coronavirus HKU1 spike (amino acid from 1–1352, GenBank  
296 accession NC\_006213), human coronavirus OC43 (amino acid from 1–1353, GenBank accession  
297 KY674921) DC-SIGN (GenBank accession NM\_021155.4), L-SIGN (gene obtained from lung  
298 cDNA library screening corresponding to GenBank accession NM\_001144904.2), human ACE2  
299 (GenBank accession NM\_021804.3), human TMPRSS2 (GenBank accession BC051839.1),  
300 human CD147 (GenBank accession NG\_007468), human IgG1 Fc segment<sup>6,40,41</sup>, genes for  
301 variable regions of mAbs, C144, 4A2, and 4A8, were retrieved from previous studies<sup>10,18</sup>.

302

### 303 **cDNA library screening**

304 A retrovirus cDNA library was constructed based on a previous study<sup>42</sup>. Briefly, cDNA was  
305 generated from a human lung poly-A<sup>+</sup> RNA (cat. 636105, Takara Bio, Kusatsu, Shiga, Japan) using  
306 a cDNA library construction kit (Takara Bio, Japan) and cloned into EcoRI and NotI sites of pMXs  
307 retrovirus vector. The ligated cDNA was transformed into XL10-gold and the plasmids were  
308 purified using a plasmid plus midi kit (Qiagen, Germantown, MD, USA). The complexity of the  
309 cDNA library was  $2 \times 10^6$ . The cDNA library was then transfected into PLAT-E packaging cells  
310 to generate a retrovirus cDNA library. Subsequently, the retrovirus cDNA library was transfected  
311 into 2B4 mouse T cell hybridoma and sorted for cells binding to the SCoV2-NTD-Fc fusion protein  
312 using an SH800S cell sorter (Sony, Japan). Single-cell clones were obtained and the genomic DNA  
313 was then isolated using a Wizard SV genomic DNA purification kit (Promega, Madison, WI, USA).  
314 The target gene was amplified by PCR using pMXs vector forward  
315 (5'GGTGGACCATCCTCTAGA3') and reverse (5'CCCTTTTTCTGGAGACTAAAT3')

316 primers. The identity of the target gene was determined by DNA sequencing. The L-SIGN gene  
317 obtained corresponded to GenBank accession NM\_001144904.2.

318

### 319 **Mutagenesis of N-linked glycosylation sites of SCoV2-NTD**

320 Single point SCoV2-NTD-Fc N-linked glycosylation site mutants (N61, 74, 122, 149, 165, 234,  
321 282Q) were generated using a QuikChange site-directed mutagenesis kit (Agilent Technologies,  
322 Santa Clara, CA, USA) to change the respective asparagine (N, Asn) residue to glutamine (Q, Gln).

323

### 324 **Recombinant protein production**

325 Recombinant DC-SIGN-Fc, L-SIGN-Fc, SCoV-NTD-Fc (amino acids 14–279), SCoV2-NTD-Fc  
326 (amino acids 14–292), SCoV2-RBD-Fc (amino acids 335–587), and SCoV2-NTD-Fc N-  
327 glycosylation site mutant fusion proteins were independently expressed as a secreted protein using  
328 HEK293T cells. The recombinant mAbs, C144, 4A2, and 4A8 were produced using Expi293 cells.  
329 The Fc fusion protein in the culture supernatant was quantified using a protein A beads assay.  
330 Essentially, the protein A was coupled to 4 µm aldehyde/sulfate latex beads (Invitrogen, USA)  
331 according to the manufacturer's instructions and used to capture the Fc fusion protein in the culture  
332 supernatant. The captured Fc fusion proteins were then detected using anti-human IgG-Fc  
333 conjugated to APC and measured using flow cytometry. The protein concentration was calculated  
334 using a known concentration of IgG-Fc fusion protein as a standard. For recombinant proteins that  
335 required purification, the culture supernatant containing the secreted fusion proteins was purified  
336 using protein-A conjugated Sepharose beads (Cytiva, Marlborough, MA, USA).

337

### 338 **Flow cytometry analysis**

339 FACSVerse™ or FACSCalibur flow cytometer (Becton Dickinson, Franklin Lake, NJ, USA) was  
340 used for flow cytometry analysis. For the binding study, cells were transiently co-transfected with  
341 the plasmid containing the respective receptors and GFP using a PEI transfection reagent<sup>39</sup>. Forty-  
342 eight hours post-infection, cells were then stained with Fc fusion proteins for 30 minutes at 4°C in  
343 Hank's buffer containing 0.1% BSA and identified using goat anti-human IgG-Fc-APC Ab prior  
344 to flow cytometry analysis. For DC- and L-SIGN blocking experiments, the cells were pre-blocked  
345 with 5 µg/mL of anti-CD209 mAb or 50 µg/mL of mannan (Sigma, USA) for 30 minutes before  
346 staining with Fc fusion protein. For the staining of the spike protein, DC-SIGN-Fc (5 µg/mL) or  
347 L-SIGN-Fc fusion protein (20 µg/mL) premixed with goat anti-human IgG-Fc-APC mAb (3  
348 µg/mL) was used. For the analysis of SCoV2-NTD N-linked glycosylation site mutants'  
349 interaction with DC-SIGN, 10 µg/mL of each mutant was used. Surface-expressed SCoV2-NTD  
350 (amino acids 14–333), SCoV2-RBD (amino acids 335–587), and SCoV2-S2 (amino acids 588–  
351 1219) were generated by fusing the respective domains with a transmembrane region derived from  
352 PILRα at the C-terminal<sup>6</sup>.

353

#### 354 **Cell-cell fusion assay**

355 Effector cells were prepared by transiently transfecting T7 RNA polymerase plasmid, pCAG-T7,  
356 and SCoV2 spike plasmid into HEK293T cells. For the target cells, HEK293T cells were  
357 transiently co-transfected with T7 promoter-luciferase plasmid, pT7EMCV-Luc, and DC-SIGN in  
358 a pcDNA3.4 vector, L-SIGN in a pcDNA3.4 vector, or a pcDNA3.4 empty vector (mock). After  
359 two days of transfection, the effector cells ( $1 \times 10^4$  cells) were cocultured with the target cells ( $1$   
360  $\times 10^4$  cells) in a 384-well white plate (Greiner Bio-One, Kremsmünster, Austria). The cells were  
361 then incubated for 24 hours at 37°C in 5% CO<sub>2</sub> and the luciferase activity was measured using the



362 ONE-Glo™ luciferase assay (Promega, USA) according to the manufacturer's instructions. The  
363 signals were recorded using a luminescence plate reader TriStar LB941 (Berthold Technologies,  
364 Bad Wilbad, Germany). For the cell-cell fusion assay using fluorescence protein, effector cells  
365 were prepared by transiently co-transfecting with SCoV2 spike and red fluorescence protein (pCI-  
366 neo-DsREDExp) into HEK293T cells. For target cells, HEK293T cells were transiently co-  
367 transfected with DC-SIGN and green fluorescence protein (pMX-GFP). After two days of  
368 transfection, the effector and target cells were enriched using a Sony SH800 cell sorter (Sony,  
369 Japan) prior to co-culture as described above. Cells were then analyzed using an IX83 Olympus  
370 microscope (Olympus, Shinjuku City, Tokyo, Japan).

371

#### 372 **SCoV2 spike-pseudotyped virus**

373 HEK293T cells were transiently transfected with expression plasmids for the SCoV2 spike protein.  
374 Twenty-four hours post-transfection, VSV-G-deficient vesicular stomatitis virus (VSV) carrying  
375 a luciferase reporter gene complemented in trans with VSV-G protein<sup>43</sup> was added and incubated  
376 for two hours. Cells were then carefully washed with DMEM media without FBS and incubation  
377 continued with DMEM supplemented with FBS at 37°C in 5% CO<sub>2</sub> for 48 hours. The supernatant  
378 containing the pseudotyped SCoV2 virions was harvested and aliquoted before storage at -80°C.

379

#### 380 **CD14<sup>+</sup> cell preparation and moDCs differentiation**

381 Peripheral blood mononuclear cells (PBMCs) were prepared from healthy individuals by  
382 centrifugation using Ficoll-Paque™ PLUS (GE Healthcare, Chicago, IL, USA). CD14<sup>+</sup> cells were  
383 isolated by positive selection using anti-CD14 conjugated microbeads (Miltenyi Biotec, Bergisch  
384 Gladbach, Germany) according to the manufacturer's instructions. Monocyte-derived dendritic

385 cells (moDCs) were stimulated as previously described<sup>44</sup>. Briefly,  $5 \times 10^5$  cells/mL of CD14<sup>+</sup>  
386 enriched cells were stimulated using recombinant human (rh) GM-CSF and rhIL-4 (BioLegend,  
387 USA) at a concentration of each 500 IU/mL in RPMI1640 media supplemented with 10% FCS at  
388 37°C in 5% CO<sub>2</sub>. The expression of CD209 was detected after two days of stimulation using an  
389 anti-CD209 monoclonal antibody.

390

### 391 **Direct infection assay**

392 For pseudotyped SCoV2 infection,  $5 \times 10^3$  cells were mixed with the pseudovirus for 24 hours at  
393 37°C in 5% CO<sub>2</sub> in a 384-well plate. Luciferase activity was then measured using the ONE-Glo™  
394 luciferase assay (Promega, USA) according to the manufacturer's instructions. The signals were  
395 recorded using a luminescence plate reader TriStar LB941 (Berthold Technologies, Germany). For  
396 neutralization assay, essentially the same protocol was conducted with the exception that the  
397 pseudovirus was preincubated with diluted patient sera or anti-NTD, clone 4A8 and 4A2  
398 monoclonal antibodies for 30 minutes at room temperature. SARS-CoV-2 convalescent patients'  
399 sera were collected from Osaka University Hospital. Patients' sera collection was approved by the  
400 IRB (No. 19546). Recombinant SCoV2 virus with a high-affinity NanoBiT (HiBiT) luciferase  
401 gene in the N-terminus of the ORF6 gene was produced as previously described<sup>45</sup>. The virus (MOI  
402 3) was added to  $1.5 \times 10^4$  cells for 24 hours at 37°C, 5% CO<sub>2</sub> in a 96-well plate. SCoV2 infected  
403 cells were collected and luciferase activity was then measured using a Nano-Glo HiBiT lytic assay  
404 system (Promega, USA), according to the manufacturer's instructions. The signals were recorded  
405 using a luminometer.

406

### 407 **Trans-infection assay**

408 moDCs were incubated with pseudotyped SCoV2 at 37°C for 60 minutes. For the blocking  
409 experiment, moDCs were preincubated with anti-CD209 antibodies (5 µg/mL), mouse IgG2a  
410 antibodies (Isotype control), or mannan (100 µg/mL) before incubation with pseudovirus. After  
411 incubation, the cells were washed three times with DMEM and subsequently added to Vero cells  
412 at a 1:1 ratio. The cells were incubated at 37°C in 5% CO<sub>2</sub> for 24 hours and luciferase activity was  
413 measured using a ONE-Glo™ luciferase assay (Promega, USA) according to the manufacturer's  
414 instructions.

415

#### 416 **Sequence, data, and statistical analysis**

417 The amino acid multiple sequence alignment in Fig. 3a was generated using the CLUSTAL Omega  
418 multiple sequence alignment tool from NCBI. FlowJo (BD Biosciences, San Jose, CA, USA) was  
419 used for analyzing flow cytometry data and Graphpad Prism version 7.0e was used for graph  
420 generation and statistical analysis. Asterisks indicate statistical significance.

421

#### 422 **Acknowledgements**

423 Soh W.T. is supported under the Kishimoto Foundation Fellowship. We would like to thank Dr.  
424 Masako KOHYAMA and Dr. Wataru NAKAI, Akihito SAKOGUCHI for technical advice. We  
425 also thank Akemi ARAKAWA, Asa TADA, Sumiko MATSUOKA for their excellent technical  
426 supports. This work was supported by JSPS KAKENHI Grant Numbers JP18H05279,  
427 JP19H03478, MEXT KAKENHI Grant Numbers JP19H04808, Japan Agency for Medical  
428 Research and Development (AMED) under Grant Number 19fk0108161h0001,  
429 20nf0101623h0201, 20nk0101602h0201.

430

431 **Author contributions**

432 W.T.S., M.Y., S.T., and H.A. conceived experiments. W.T.S., Y.L., N.E.E., and O.C., performed  
433 experiments. N. H. collected patients' sera. W.T.S. and H.A. wrote the manuscript. All authors  
434 read, edit, and approved the manuscript.

435

436 **Competing interests**

437 All authors declare no conflict of interest.

438

439 **References**

- 440 1. Phelan, A.L., Katz, R. & Gostin, L.O. The Novel Coronavirus Originating in Wuhan, China:  
441 Challenges for Global Health Governance. *JAMA* **323**, 709-710 (2020).
- 442 2. Zhou, P., *et al.* A pneumonia outbreak associated with a new coronavirus of probable bat  
443 origin. *Nature* **579**, 270-273 (2020).
- 444 3. Hoffmann, M., *et al.* SARS-CoV-2 Cell Entry Depends on ACE2 and TMPRSS2 and Is  
445 Blocked by a Clinically Proven Protease Inhibitor. *Cell* **181**, 271-280 e278 (2020).
- 446 4. Shang, J., *et al.* Cell entry mechanisms of SARS-CoV-2. *Proc. Natl. Acad. Sci. USA* **117**,  
447 11727-11734 (2020).
- 448 5. Li, W., *et al.* Angiotensin-converting enzyme 2 is a functional receptor for the SARS  
449 coronavirus. *Nature* **426**, 450-454 (2003).
- 450 6. Satoh, T., *et al.* PILR $\alpha$  is a herpes simplex virus-1 entry coreceptor that associates with  
451 glycoprotein B. *Cell* **132**, 935-944 (2008).
- 452 7. Suenaga, T., *et al.* Myelin-associated glycoprotein mediates membrane fusion and entry of  
453 neurotropic herpesviruses. *Proc. Natl. Acad. Sci. USA* **107**, 866-871 (2010).

- 454 8. Cai, Y., *et al.* Distinct conformational states of SARS-CoV-2 spike protein. *Science* (2020).
- 455 9. Wrapp, D., *et al.* Cryo-EM structure of the 2019-nCoV spike in the prefusion conformation.  
456 *Science* **367**, 1260-1263 (2020).
- 457 10. Chi, X., *et al.* A neutralizing human antibody binds to the N-terminal domain of the Spike  
458 protein of SARS-CoV-2. *Science* **369**, 650-655 (2020).
- 459 11. Huang, C., *et al.* Clinical features of patients infected with 2019 novel coronavirus in  
460 Wuhan, China. *Lancet* **395**, 497-506 (2020).
- 461 12. Zou, X., *et al.* Single-cell RNA-seq data analysis on the receptor ACE2 expression reveals  
462 the potential risk of different human organs vulnerable to 2019-nCoV infection. *Front.*  
463 *Med.* **14**, 185-192 (2020).
- 464 13. Bost, P., *et al.* Host-Viral Infection Maps Reveal Signatures of Severe COVID-19 Patients.  
465 *Cell* **181**, 1475-1488 e1412 (2020).
- 466 14. Dorward, D.A., *et al.* Tissue-specific tolerance in fatal Covid-19. *medRxiv*,  
467 2020.2007.2002.20145003 (2020).
- 468 15. Wang, K., *et al.* SARS-CoV-2 invades host cells via a novel route: CD147-spike protein.  
469 *bioRxiv*, 2020.2003.2014.988345 (2020).
- 470 16. Okuma, K., Nakamura, M., Nakano, S., Niho, Y. & Matsuura, Y. Host range of human T-  
471 cell leukemia virus type I analyzed by a cell fusion-dependent reporter gene activation  
472 assay. *Virology* **254**, 235-244 (1999).
- 473 17. Bruchez, A., *et al.* MHC class II transactivator CIITA induces cell resistance to Ebola virus  
474 and SARS-like coronaviruses. *Science* (2020).
- 475 18. Robbiani, D.F., *et al.* Convergent antibody responses to SARS-CoV-2 in convalescent  
476 individuals. *Nature* **584**, 437-442 (2020).

- 477 19. Wang, C., *et al.* A human monoclonal antibody blocking SARS-CoV-2 infection. *Nat.*  
478 *Commun.* **11**, 2251 (2020).
- 479 20. Wrapp, D., *et al.* Structural Basis for Potent Neutralization of Betacoronaviruses by Single-  
480 Domain Camelid Antibodies. *Cell* **181**, 1004-1015 e1015 (2020).
- 481 21. Bhaskar, S., *et al.* Cytokine Storm in COVID-19-Immunopathological Mechanisms,  
482 Clinical Considerations, and Therapeutic Approaches: The REPROGRAM Consortium  
483 Position Paper. *Front. Immunol.* **11**, 1648 (2020).
- 484 22. Helms, J., *et al.* High risk of thrombosis in patients with severe SARS-CoV-2 infection: a  
485 multicenter prospective cohort study. *Intensive Care Med.* **46**, 1089-1098 (2020).
- 486 23. Katsiki, N., Banach, M. & Mikhailidis, D.P. Lipid-lowering therapy and renin-angiotensin-  
487 aldosterone system inhibitors in the era of the COVID-19 pandemic. *Arch. Med. Sci.* **16**,  
488 485-489 (2020).
- 489 24. Cantuti-Castelvetri, L., *et al.* Neuropilin-1 facilitates SARS-CoV-2 cell entry and  
490 infectivity. *Science* (2020).
- 491 25. Daly, J.L., *et al.* Neuropilin-1 is a host factor for SARS-CoV-2 infection. *Science* (2020).
- 492 26. Jeffers, S.A., *et al.* CD209L (L-SIGN) is a receptor for severe acute respiratory syndrome  
493 coronavirus. *Proc. Natl. Acad. Sci. USA* **101**, 15748-15753 (2004).
- 494 27. Engering, A., *et al.* Dynamic populations of dendritic cell-specific ICAM-3 grabbing  
495 nonintegrin-positive immature dendritic cells and liver/lymph node-specific ICAM-3  
496 grabbing nonintegrin-positive endothelial cells in the outer zones of the paracortex of  
497 human lymph nodes. *Am. J. Pathol.* **164**, 1587-1595 (2004).
- 498 28. Khoo, U.S., Chan, K.Y., Chan, V.S. & Lin, C.L. DC-SIGN and L-SIGN: the SIGNs for  
499 infection. *J. Mol. Med. (Berl)* **86**, 861-874 (2008).

- 500 29. Marzi, A., *et al.* DC-SIGN and DC-SIGNR interact with the glycoprotein of Marburg virus  
501 and the S protein of severe acute respiratory syndrome coronavirus. *J. Virol.* **78**, 12090-  
502 12095 (2004).
- 503 30. Shajahan, A., Supekar, N.T., Gleinich, A.S. & Azadi, P. Deducing the N- and O-  
504 glycosylation profile of the spike protein of novel coronavirus SARS-CoV-2. *Glycobiology*  
505 (2020).
- 506 31. Watanabe, Y., Allen, J.D., Wrapp, D., McLellan, J.S. & Crispin, M. Site-specific glycan  
507 analysis of the SARS-CoV-2 spike. *Science* (2020).
- 508 32. Watanabe, Y., *et al.* Vulnerabilities in coronavirus glycan shields despite extensive  
509 glycosylation. *Nat. Commun.* **11**, 2688 (2020).
- 510 33. Feinberg, H., Mitchell, D.A., Drickamer, K. & Weis, W.I. Structural basis for selective  
511 recognition of oligosaccharides by DC-SIGN and DC-SIGNR. *Science* **294**, 2163-2166  
512 (2001).
- 513 34. Bosch, B.J., Bartelink, W. & Rottier, P.J. Cathepsin L functionally cleaves the severe acute  
514 respiratory syndrome coronavirus class I fusion protein upstream of rather than adjacent to  
515 the fusion peptide. *J. Virol.* **82**, 8887-8890 (2008).
- 516 35. Figueiredo, C.R., *et al.* Blockade of MIF-CD74 Signalling on Macrophages and Dendritic  
517 Cells Restores the Antitumour Immune Response Against Metastatic Melanoma. *Front.*  
518 *Immunol.* **9**, 1132 (2018).
- 519 36. Geijtenbeek, T.B., *et al.* DC-SIGN, a dendritic cell-specific HIV-1-binding protein that  
520 enhances trans-infection of T cells. *Cell* **100**, 587-597 (2000).

- 521 37. Bashirova, A.A., *et al.* A dendritic cell-specific intercellular adhesion molecule 3-grabbing  
522 nonintegrin (DC-SIGN)-related protein is highly expressed on human liver sinusoidal  
523 endothelial cells and promotes HIV-1 infection. *J. Exp. Med.* **193**, 671-678 (2001).
- 524 38. Morita, S., Kojima, T. & Kitamura, T. Plat-E: an efficient and stable system for transient  
525 packaging of retroviruses. *Gene Ther.* **7**, 1063-1066 (2000).
- 526 39. Longo, P.A., Kavran, J.M., Kim, M.S. & Leahy, D.J. Transient mammalian cell  
527 transfection with polyethylenimine (PEI). *Methods Enzymol.* **529**, 227-240 (2013).
- 528 40. Hirayasu, K., *et al.* Microbially cleaved immunoglobulins are sensed by the innate immune  
529 receptor LILRA2. *Nat. Microbiol.* **1**, 16054 (2016).
- 530 41. Saito, F., *et al.* Immune evasion of *Plasmodium falciparum* by RIFIN via inhibitory  
531 receptors. *Nature* **552**, 101-105 (2017).
- 532 42. Arase, H., Saito, T., Phillips, J.H. & Lanier, L.L. Cutting edge: the mouse NK cell-  
533 associated antigen recognized by DX5 monoclonal antibody is CD49b ( $\alpha 2$  integrin, very  
534 late antigen-2). *J. Immunol.* **167**, 1141-1144 (2001).
- 535 43. Whitt, M.A. Generation of VSV pseudotypes using recombinant DeltaG-VSV for studies  
536 on virus entry, identification of entry inhibitors, and immune responses to vaccines. *J. Virol.*  
537 *Methods* **169**, 365-374 (2010).
- 538 44. Chometon, T.Q., *et al.* A protocol for rapid monocyte isolation and generation of singular  
539 human monocyte-derived dendritic cells. *PLoS One* **15**, e0231132 (2020).
- 540 45. Torii, S., *et al.* Establishment of a reverse genetics system for SARS-CoV-2 using circular  
541 polymerase extension reaction. *bioRxiv* (2020).

542



543 **Figures and figure legends**

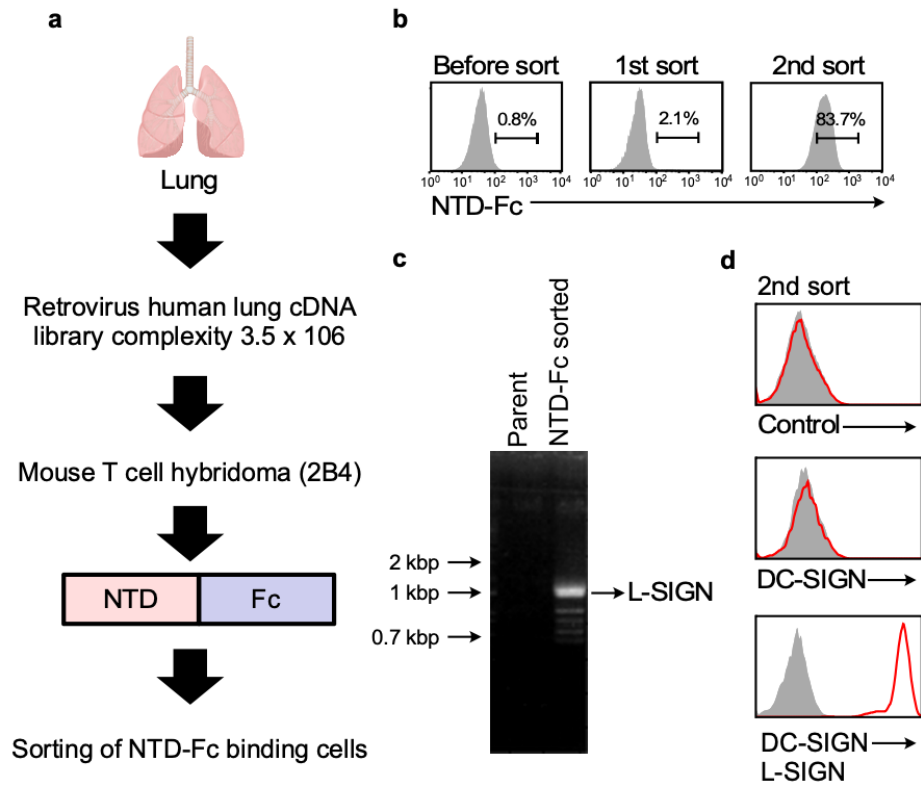

544

545

546 **Fig. 1 Lung cDNA library screening using the NTD-Fc of SCoV2 spike.** **a**, The workflow of  
547 lung cDNA library screening. **b**, Cells transfected with retrovirus cDNA library were stained with  
548 SCoV2-NTD-Fc. Proportions of cells stained with SCoV2-NTD-Fc are shown. **c**, DNA agarose  
549 gel electrophoresis of cDNA library derived genes amplified from a single-cell clone stained with  
550 SCoV2-NTD-Fc. The indicated band was identified as L-SIGN. **d**, Single-cell clone stained with  
551 SCoV2-NTD-Fc was analyzed by anti-DC-SIGN mAb and anti-DC/L-SIGN mAb (red line) or  
552 control (shaded gray).  
553

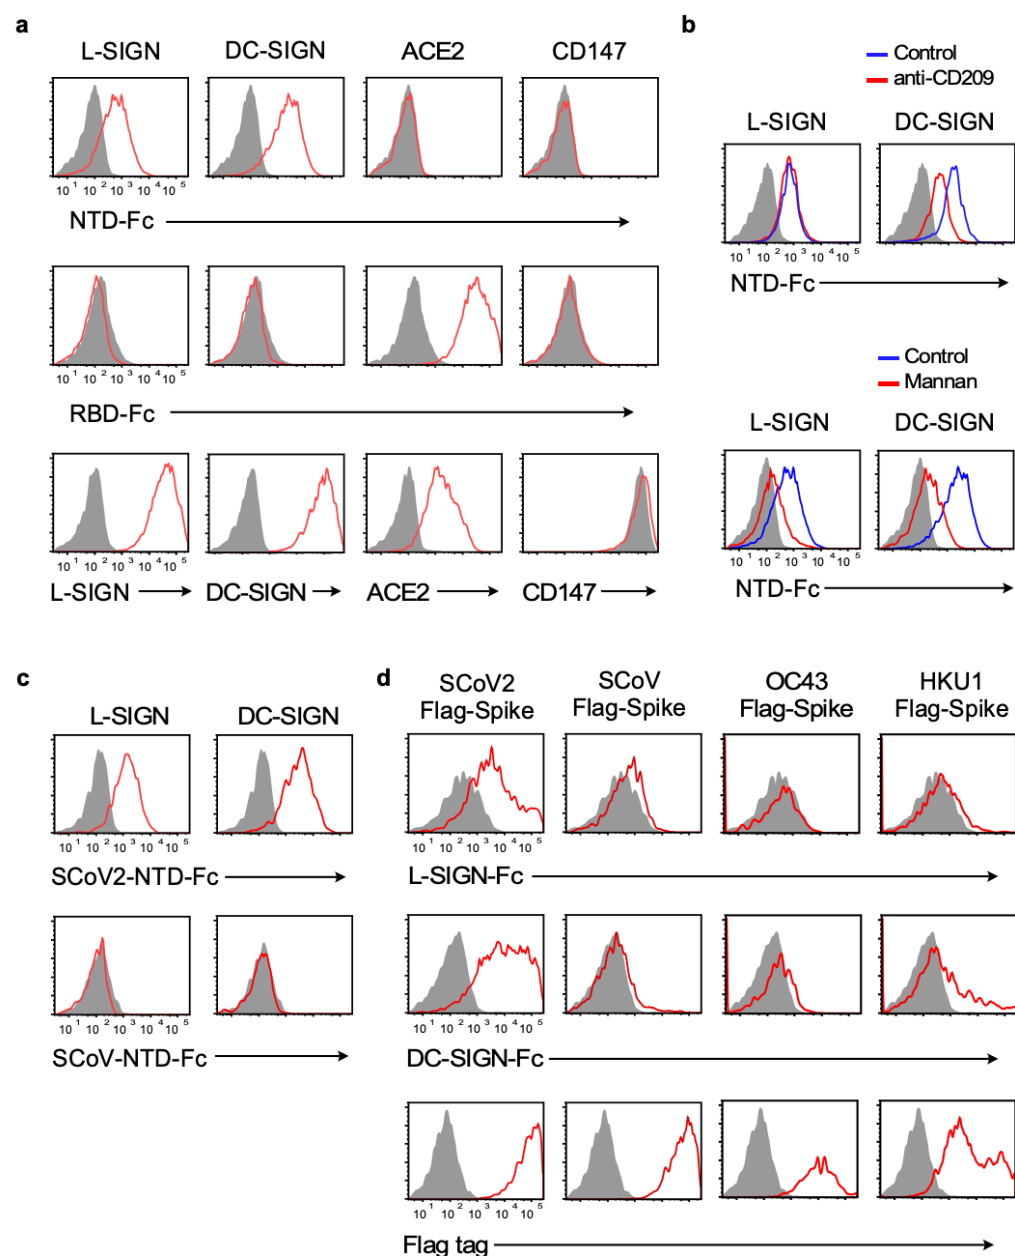

554  
 555 **Fig. 2 Cell surface binding analyses of the SCoV2 spike bound to DC-SIGN and L-SIGN**  
 556 **using flow cytometry. a,** Cells transfected with ACE2, L-SIGN, DC-SIGN, and CD147 (red line)  
 557 or mock (shaded gray) were stained with SCoV2-NTD-Fc and RBD-Fc fusion protein (10  $\mu$ g/mL).  
 558 Each transfectant was also stained with a specific monoclonal antibody. **b,** Effect of mannin and  
 559 anti-CD209 (anti-DC-SIGN) antibody on SCoV2-NTD-Fc binding to DC- and L-SIGN  
 560 transfectants or mock (shaded gray). The transfectants were preincubated with mannin (light blue  
 561 line) or anti-CD209 antibody (dark blue), followed by the staining with NTD-Fc fusion protein. **c,**  
 562 Staining of DC- and L-SIGN transfectants (red line) or mock (shaded gray) with SCoV2-NTD-Fc  
 563 and SCoV-NTD-Fc fusion proteins (10  $\mu$ g/mL). **d,** Cells transfected with flag-tagged spike  
 564 proteins of SCoV2, SCoV, human coronavirus OC43, or HKU1 (red line) or mock (shaded gray)  
 565 were stained with DC-, L-SIGN-Fc fusion proteins or anti-Flag-tag antibody. Proportions of the  
 566 stained cells are shown. Data are representative of three independent experiments.

567

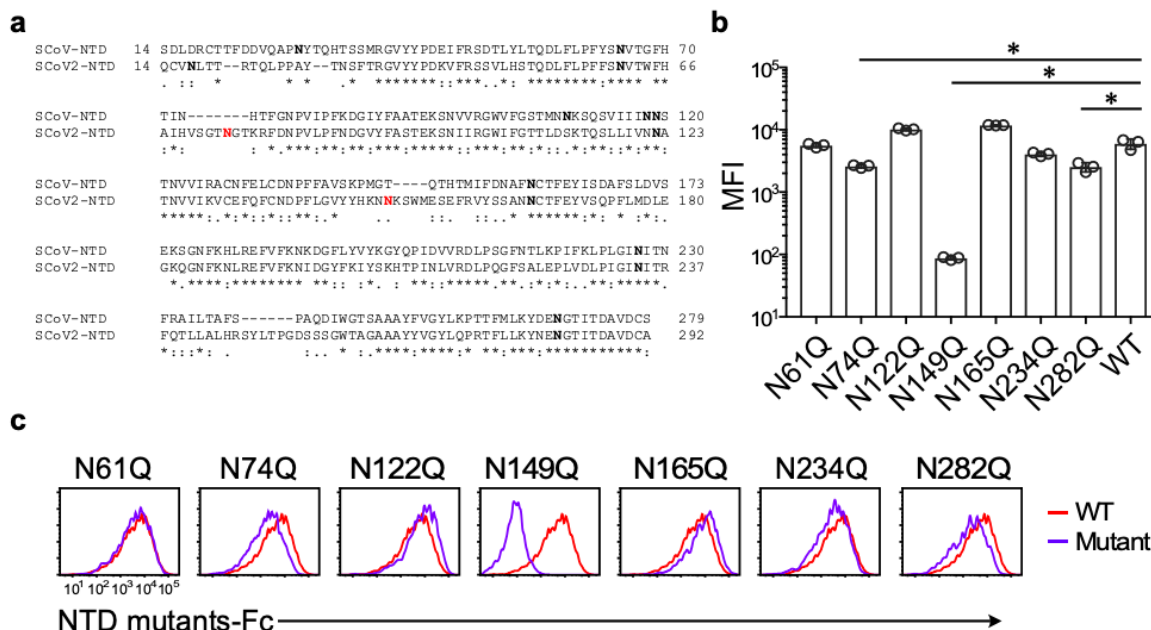

568

569

570

571

572

573

574

575

576

577

578

579

**Fig. 3 Effect of N-linked glycosylation on SCoV2-NTD interaction with DC-SIGN. a**, Amino acid sequence alignment of the NTD between SCoV and SCoV2 spike. Bold asparagine (N) residues indicate the N-linked glycan sites<sup>30-32</sup>. Highlighted asparagine residues in red indicate the unique N-glycosylation sites in SCoV2. **b**, DC-SIGN transfectants were stained with NTD-Fc fusion proteins in which N-glycosylation sites were mutated and analyzed by flow cytometry. Mean fluorescence intensities (MFI) of the cells were shown. Asterisks indicate statistical significance derived from unpaired T-test; \* $P < 0.0001$ . **c**, Representative histogram of DC-SIGN transfectants stained with NTD-Fc mutants is shown. Proportion of cells stained with NTD-Fc mutants were shown. Data are representative of three independent experiments.

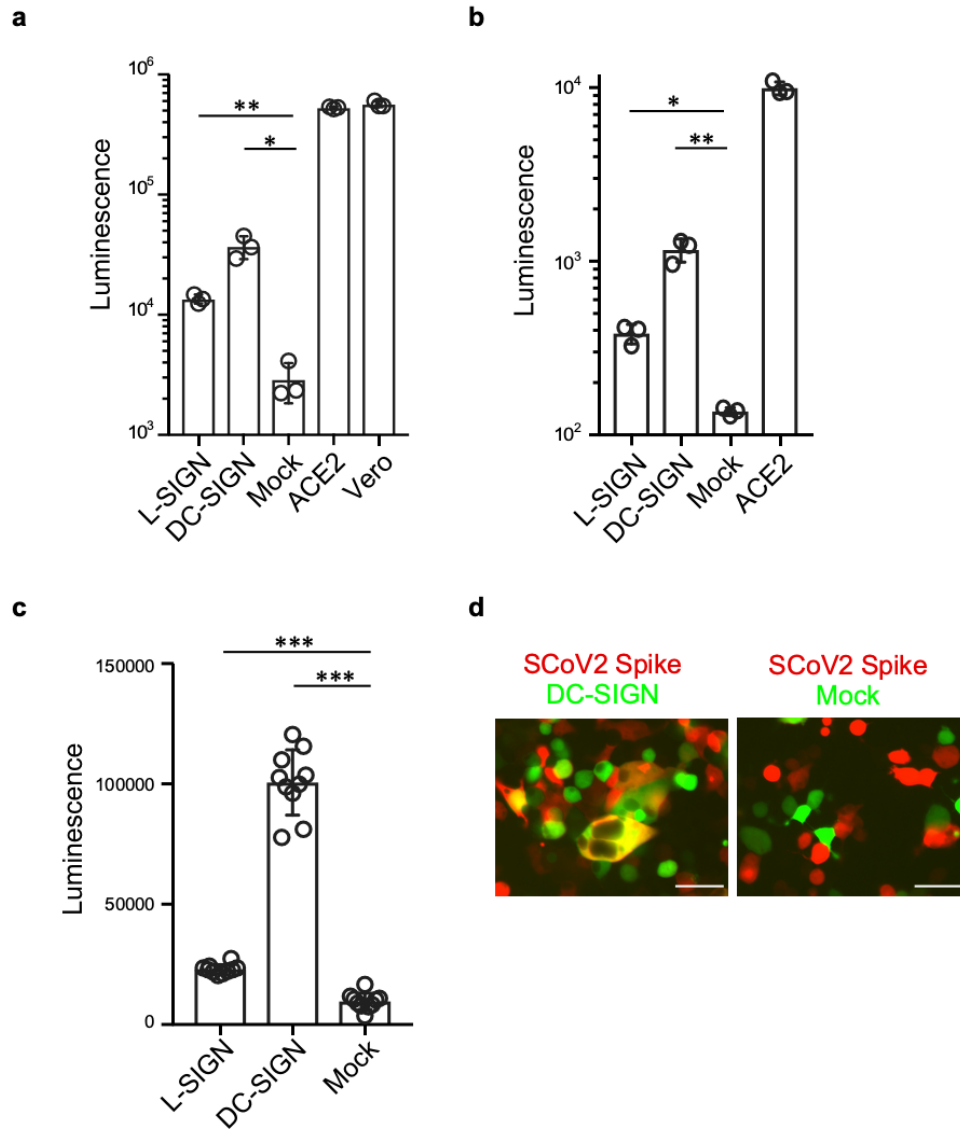

580  
581  
582  
583  
584  
585  
586  
587  
588  
589  
590  
591  
592  
593  
594  
595

**Fig. 4 DC-SIGN and L-SIGN mediate SCoV2 infection.** **a**, SCoV2-PV infection on DC-SIGN, L-SIGN, mock, or ACE2 transfectants and Vero E6 cells. SCoV2-PV carrying a luciferase gene was used for the infection and luciferase activity was measured 24 h later. Asterisks indicate statistical significance derived from unpaired T-test; \* $P = 0.0018$ ; \*\* $P = 0.0003$  **b**, DC-SIGN or L-SIGN transfectants were infected with recombinant SCoV2 with the NanoBiT luciferase gene. The luciferase activity was measured 24 h later. Asterisks indicate statistical significance derived from unpaired T-test; \* $P = 0.001$ ; \*\* $P = 0.0006$ . **c**, Cell-cell fusion assay of SCoV2 spike transfectants and DC- or L-SIGN transfectants. The effector cells expressing spike and T7 polymerase were cocultured with target cells expressing DC-SIGN, L-SIGN, mock, and T7 promoter-driven luciferase. Luciferase activities were measured after 24 h. Asterisks indicate statistical significance derived from unpaired T-test \*\*\* $P < 0.0001$ . **d**, Cell-cell fusion assay of SCoV2 spike transfectants (red) and DC-SIGN transfectants (green). Representative images are shown. Scale bar represents 50 μm in length. Data are representative of three independent experiments.

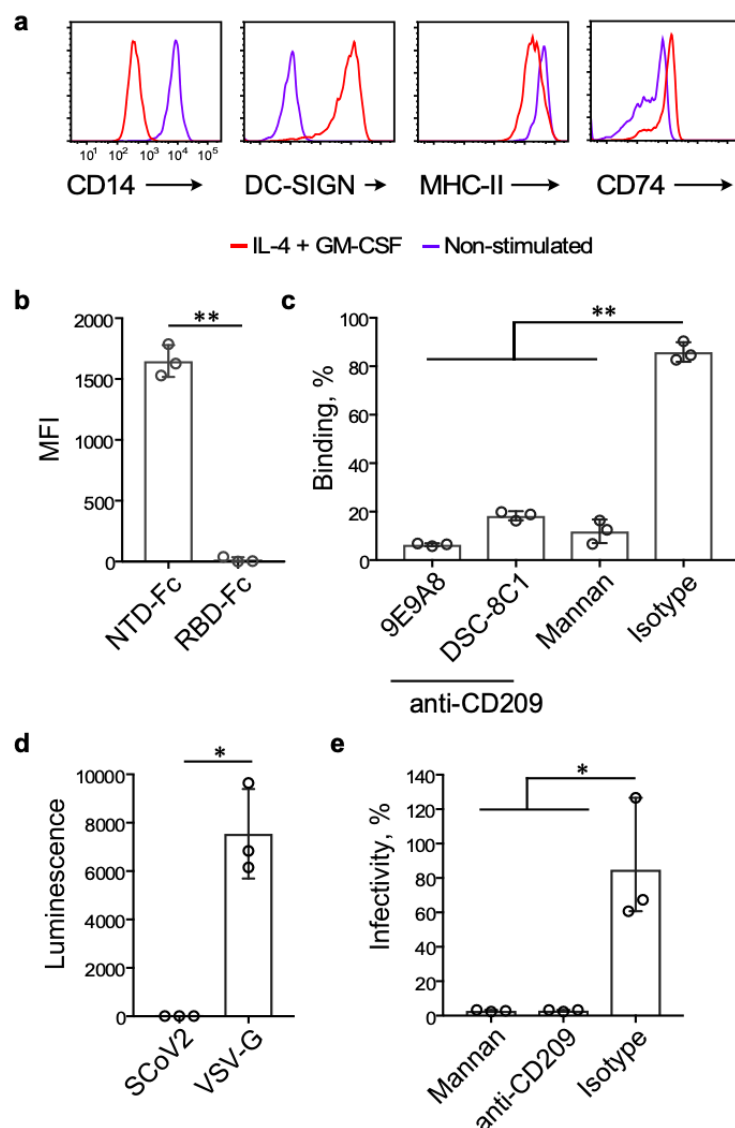

596  
597

598 **Fig. 5 moDCs facilitate SCoV2 infection in trans through DC-SIGN.** **a**, Phenotype of the  
599 CD14<sup>+</sup> cells from PBMC cultured in the presence (red line) or absence (purple line) of cytokines  
600 (IL-4 and GM-CSF, 500 IU/mL each) for three days. **b**, Binding of SCoV2-NTD-Fc and RBD-Fc  
601 of SCoV2 spike to moDCs. The amount of Fc-fusion proteins bound to moDCs were presented as  
602 mean fluorescence intensity (MFI). Asterisks indicate statistical significance derived from an  
603 unpaired T-test; \*\* $P < 0.0001$ . **c**, Blocking of SCoV2-NTD-Fc binding to moDCs by two specific  
604 anti-DC-SIGN mAbs, isotype antibody, and mannan. The percentage of binding is calculated  
605 based on the MFI value of non-blocking control. Asterisks indicate statistical significance derived  
606 from unpaired T-test; \*\* $P < 0.0001$ . **d**, SCoV2-PV and VSV-G PV infection on moDCs. Asterisks  
607 indicate statistical significance derived from unpaired T-test; \* $P = 0.0021$ . **e**, SCoV2-PV infection  
608 in trans on Vero E6 cells facilitated by moDCs. moDCs was incubated with SCoV2-PV in the  
609 presence or absence of anti-DC-SIGN antibody or mannan, and cocultured with Vero E6 cells after  
610 extensive washing. Infectivity was calculated based on the luciferase activity of a non-blocking  
611 control. Asterisks indicate statistical significance derived from unpaired T-test; \* $P = 0.005$ . Data  
612 are representative of three independent experiments.

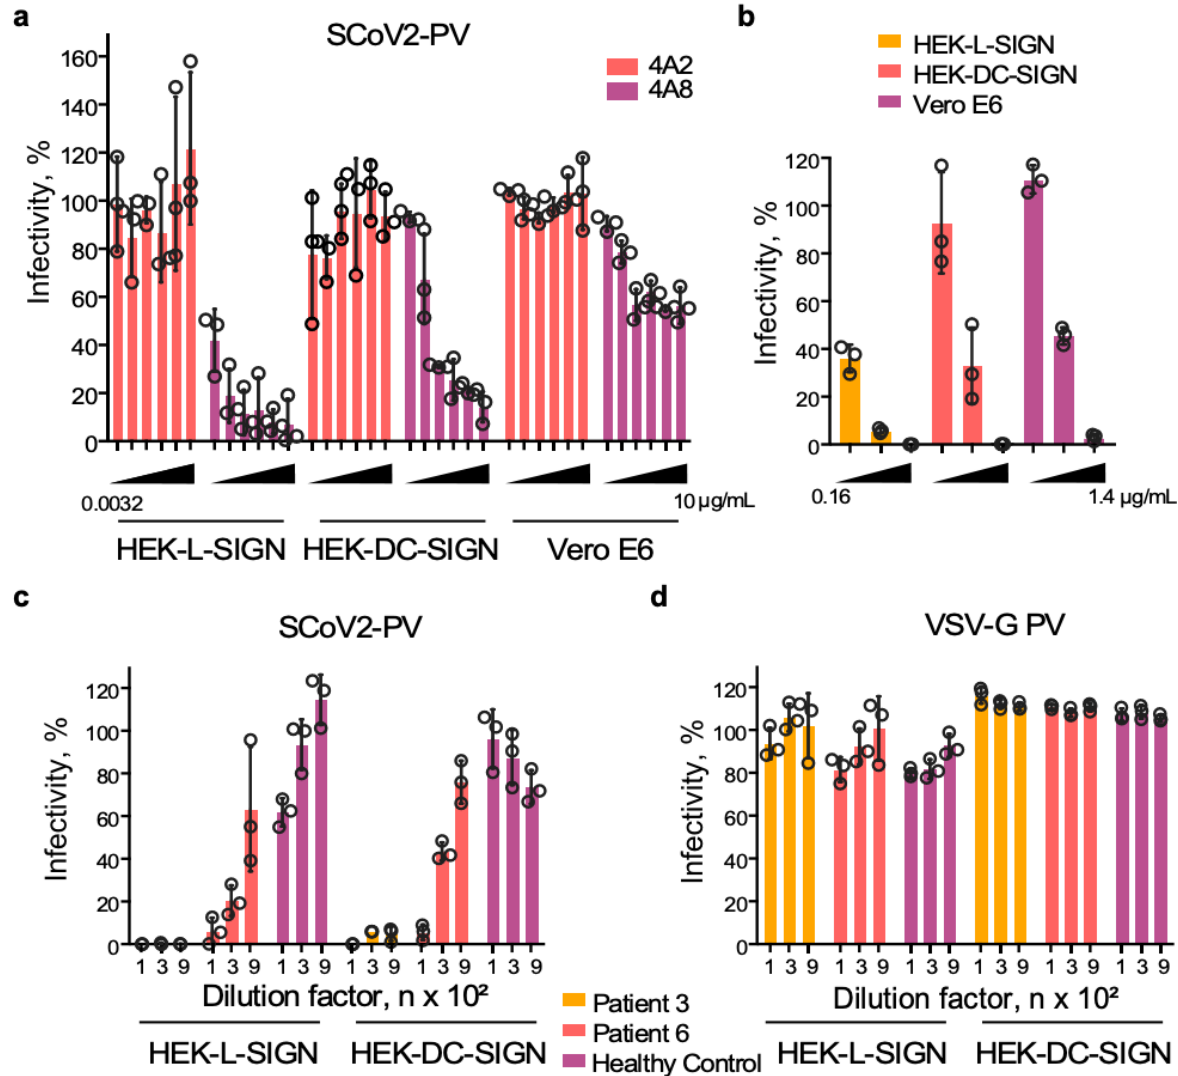

613  
614

615 **Fig. 6 Neutralizing potency of SCoV2 convalescent patients' sera and anti-NTD antibodies**  
 616 **to L-SIGN and DC-SIGN mediated infection.** Neutralization assay of pseudotyped SCoV2  
 617 infection on HEK-L-SIGN, HEK-DC-SIGN, and Vero cells by human anti-SCoV2-NTD mAbs (a)  
 618 and human anti-SCoV2-RBD (C144) specific mAb (b). SCoV2-PV preincubated with mAbs was  
 619 used to infect the cells. Neutralization assay of SCoV2-PV (c) and VSV-G PV (d) infection of L-  
 620 SIGN or DC-SIGN transfectants by serum from SCoV2-infected patients or healthy control.  
 621 SCoV2-PV or VSV-G PV preincubated with sequentially diluted serum was used to infect L-SIGN  
 622 or DC-SIGN transfectants and luciferase activity was measured. The percentage of infectivity was  
 623 calculated based on the luminescence value of no serum or mAb control. Data are representative  
 624 of three independent experiments.

625  
626
